# Supplementary material for: Characterization of BoHV-1 gG-/tk-/gE- Mutant in Differential Protein Expression, Virulence, and Immunity
Source: Vet Sci. 2021 Oct 27;8(11):253. doi: 10.3390/vetsci8110253 (PMC8621285; doi:10.3390/vetsci8110253)
Supplement: Supplementary file 1 [file vetsci-08-00253-s001.zip › vetsci-1352317-supplementary.pdf]

Article

# Characterization of BoHV-1 gG-/tk-/gE- Mutant in Differential Protein Expression, Virulence, and Immunity

Marawan Adel Marawan , Mingliang Deng, Chen Wang, Yingyu Chen, Changmin Hu, Jianguo Chen, Xi Chen, Huanchun Chen and Aizhen Guo

## Supplementary Materials

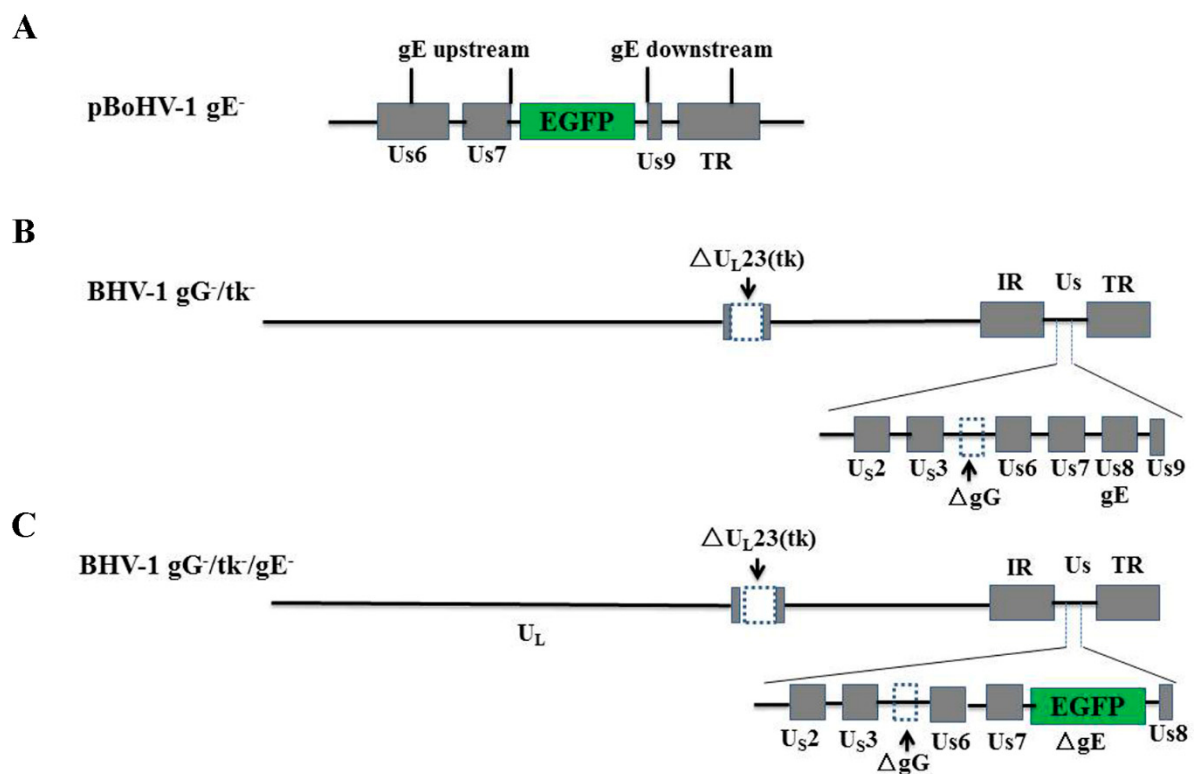

**Figure S1.** Construction strategy of pBoHV-1 gE<sup>-</sup> and recombinant BoHV-1 gG<sup>-</sup>/tk<sup>-</sup>/gE<sup>-</sup> viruses based on BoHV-1 gG<sup>-</sup>/tk<sup>-</sup> mutant. (A) Construction of transfer vector, including target deletion region, upstream, downstream fragments and inserted EGFP expression cassette. (B) BoHV-1 gG<sup>-</sup>/tk<sup>-</sup> genome. (C) BoHV-1 gG<sup>-</sup>/tk<sup>-</sup>/gE<sup>-</sup> genome. The gE gene was deleted by insertion of EGFP expression cassette.

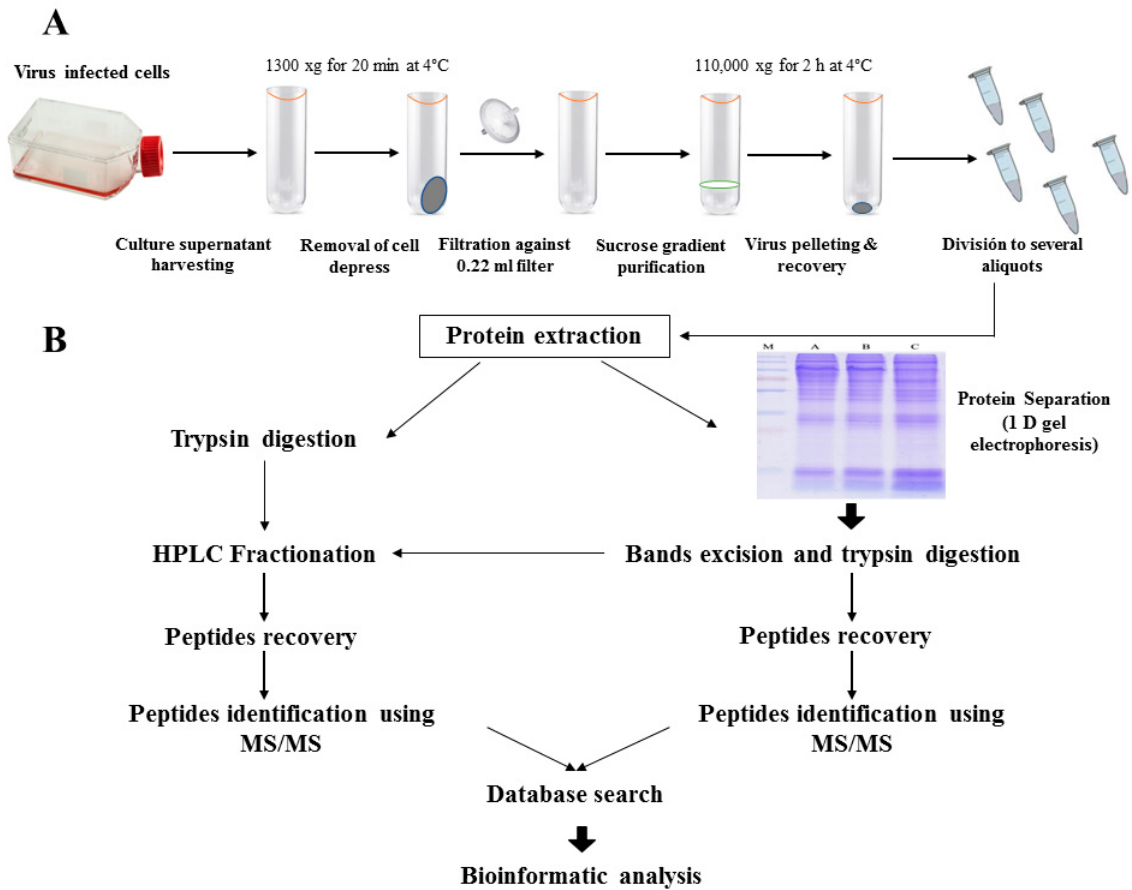

**Figure S2.** General workflow for the purification of the 4 different virions of BoHV-1 and mass spectrometry steps of LC-MS/MS. (A) Extracellular virions were purified using centrifugation/ultracentrifugation method on sucrose density gradient cushion. As the step of purity of crucial importance, EM observation is carried out to confirm the purity of the virions and absence of cell debris. Contaminating proteins were removed by the proteolysis of purified virions (B) Fig Analysis of virion-associated protein composition by mass spectrometry. Typical steps for analyzing virion-associated proteins by LC-MS/MS of extracted proteins of purified virions and separated proteins of purified virions using 1 D gel electrophoresis. Finally, database search and bioinformatic analysis were performed.

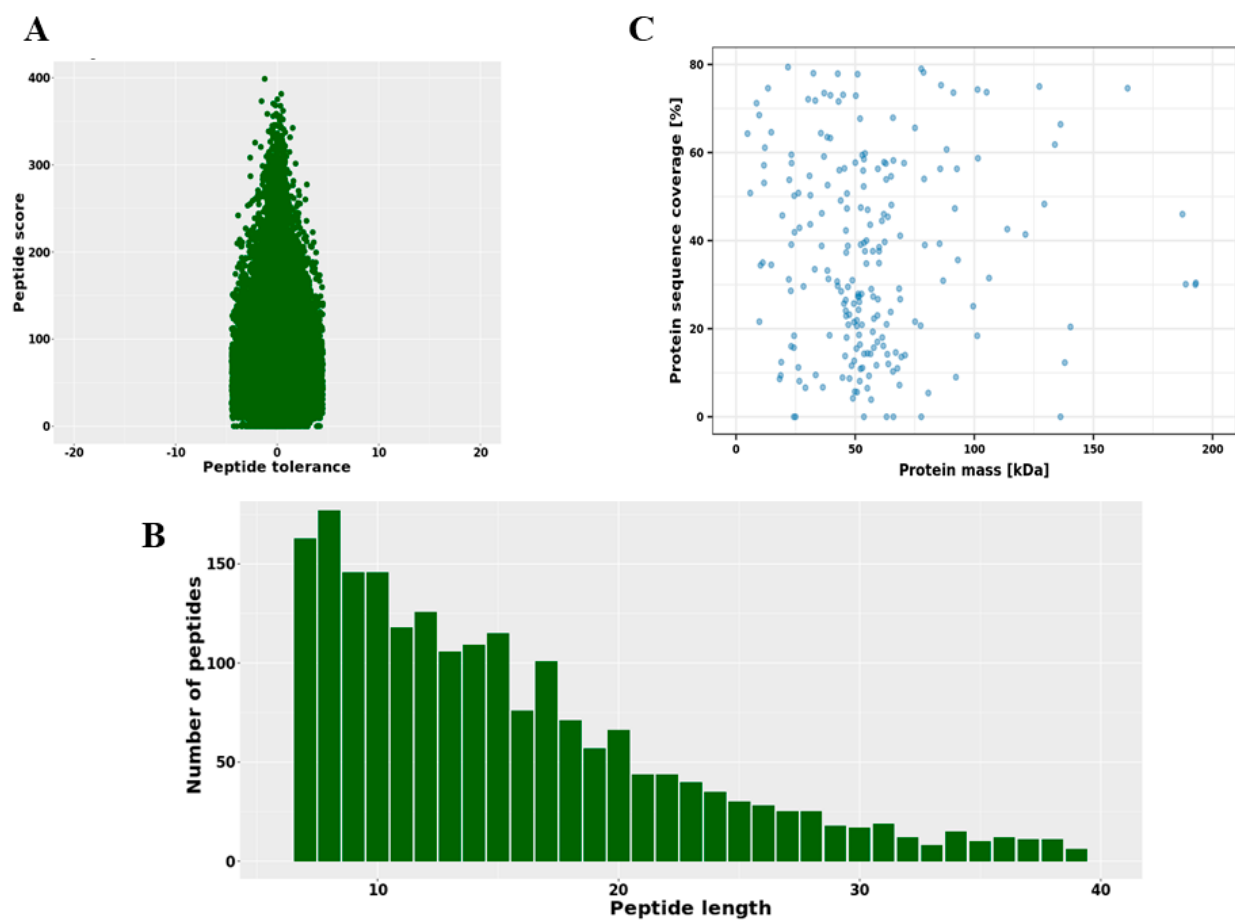

**Figure S3.** Quality Control (QC) Validation of MS Data; (A) Peptide mass tolerance distribution (B) identified peptide length distribution (C) protein mass and coverage distribution.

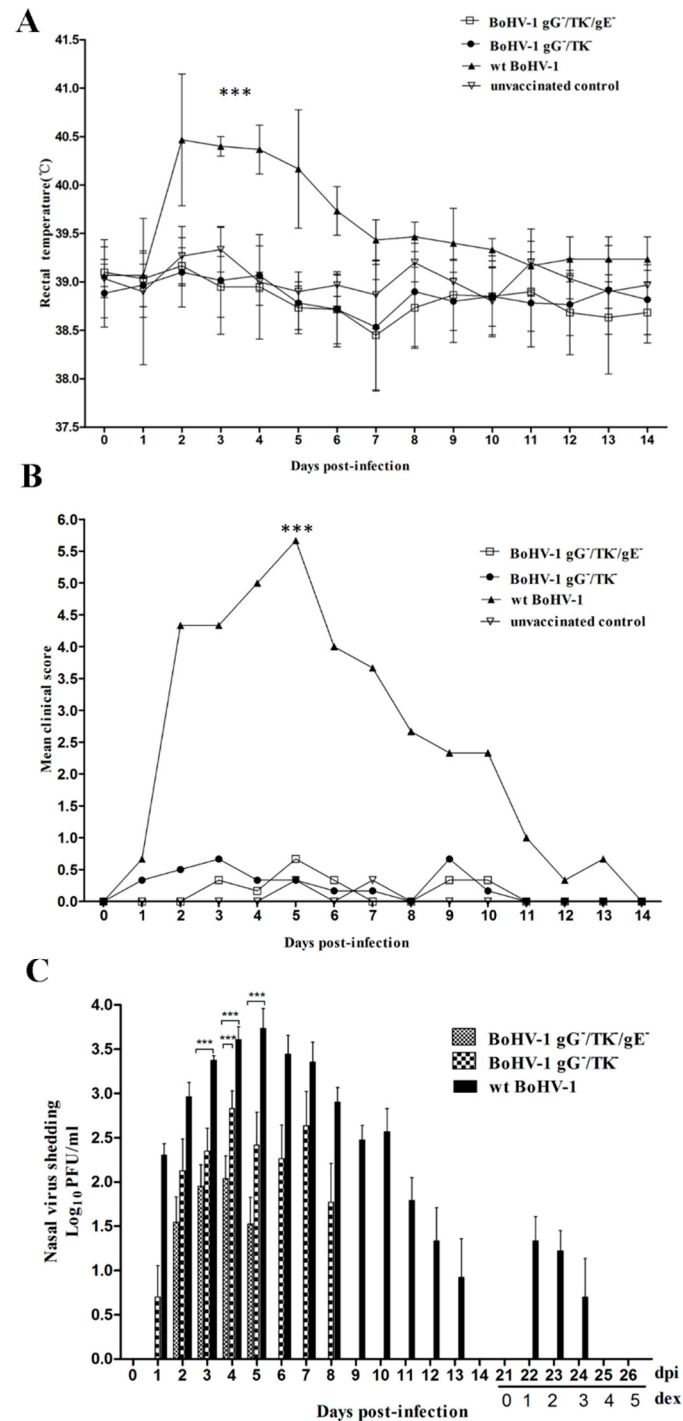

**Figure S4.** Clinical signs and reactivation of BoHV-1 mutant in calves. Temperature change (A), Mean daily clinical score (B), and nasal virus shedding (C) in calves following vaccination with BoHV-1 gG<sup>-</sup>/tk<sup>-</sup>/gE<sup>-</sup>, BoHV-1 gG<sup>-</sup>/tk<sup>-</sup> and wt BoHV-1 and after dexamethasone injection. Clinical signs combining body temperature, behavior, presence of coughs, abnormal respiration, ocular and nasal discharges, hyperemia, or lesions of the nasal mucosa, and conjunctivitis were scored as described earlier [1]. Nasal virus shedding was detected as described below: nasal swabs were submitted for virus isolation and quantitation. The nasal swab medium was filtered through 0.22  $\mu$ m filters before being inoculated into MDBK cell cultures in 24-well tissue culture plates. The plates were monitored daily for characteristic BoHV cytopathic effects (CPE) for up to 4 days. The infectivity of the samples positive to the virus was subsequently quantified by plaque assay on MDBK cells in 24-well cell culture plates as described previously [2].

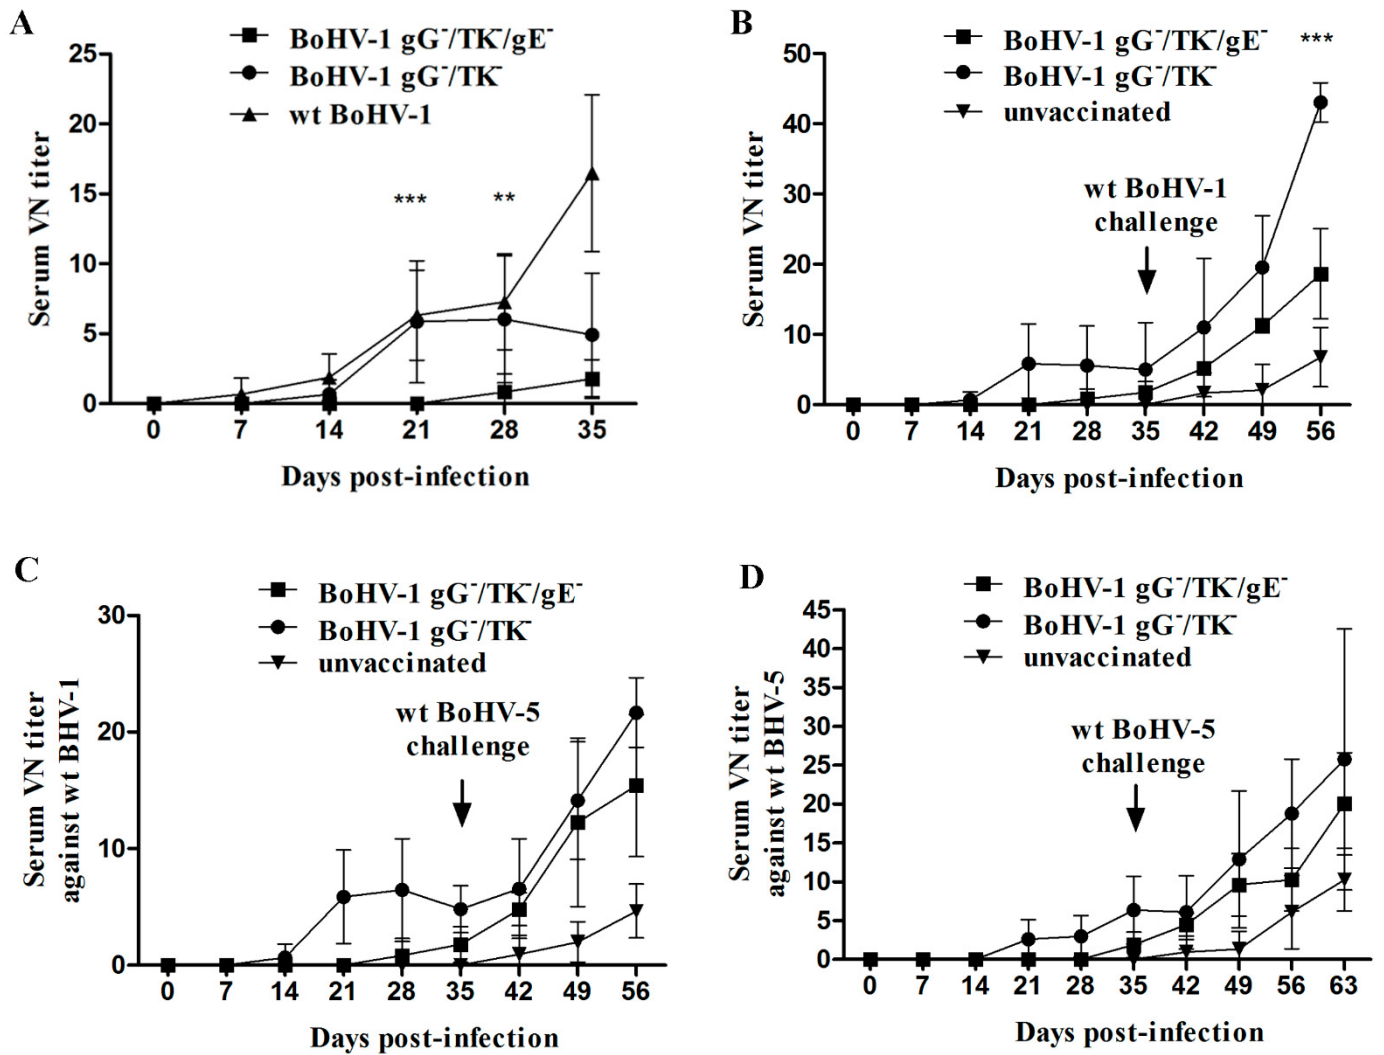

**Figure S5.** Virus-neutralizing (VN) antibodies titers in calves. Virus-neutralizing (VN) antibodies against BoHV-1 following vaccination (A) and challenge with wt BoHV-1 (B) or wt BoHV-5 (C). VN antibodies against BoHV-5 after challenge with wt BoHV-5 (D). VN antibodies were examined in a varying serum-constant virus neutralization (SN) assay in 96-well plates, with two-fold dilutions of serum against 100 TCID<sub>50</sub> of either BoHV-1 strain HB06 or BoHV-5 strain EVI 88/95. The VN titers were expressed as the reciprocal of the highest serum dilution that prevented the development of cytopathic effect (CPE) after 72 h of incubation at 37 °C. The mark (\*\*) with  $p < 0.01$  and (\*\*\*) with  $p < 0.001$  were considered to indicate a significant or high significant statistical difference respectively.

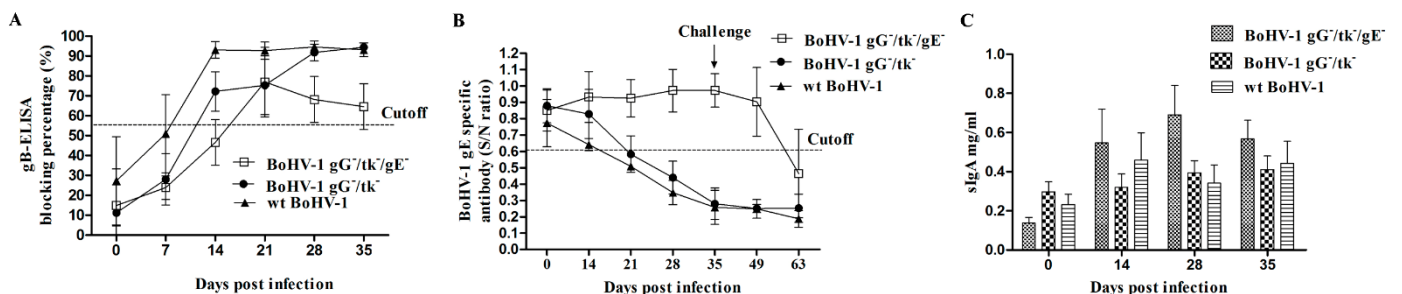

**Figure S6.** Antibody ELISA assays. Anti-BoHV-1 gB antibody (A), gE antibody (B) and serum sIgA (C) were determined in serum from vaccinated animals at different days post-infection. Serum samples with blocking % of 55% and greater are considered positive for BoHV-1 gB antibodies. Serum samples with an S/N ratio of 0.60 and lower are considered positive for BoHV-1 gE antibodies.

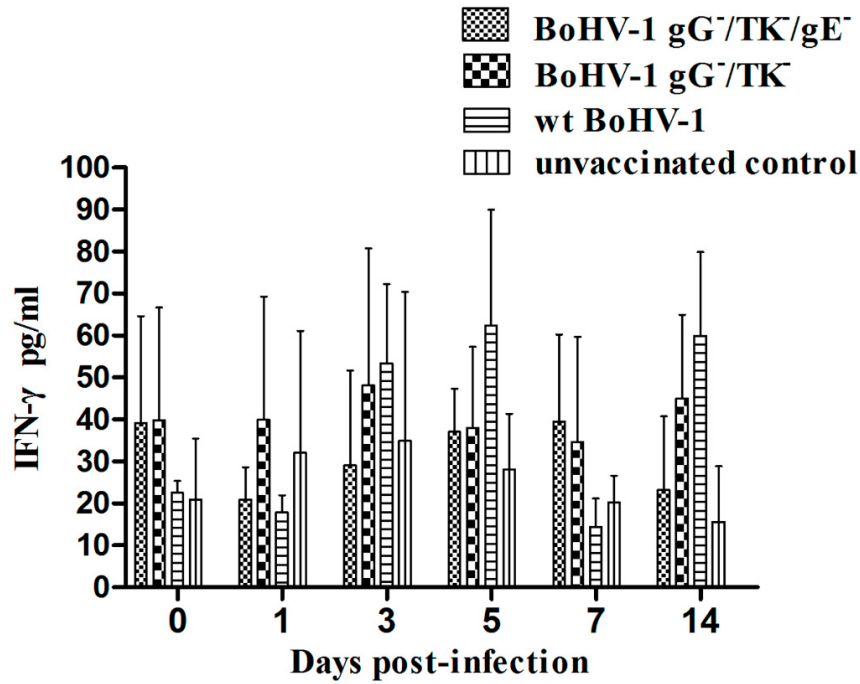

Figure S7. IFN- $\gamma$  detection after vaccination.

Table S1. The primers used in this study.

| Purpose                   | Primes and sequences 5'→3' <sup>a</sup> | Restriction sites | GenBank accession no | Position in the genome (nt) |
|---------------------------|-----------------------------------------|-------------------|----------------------|-----------------------------|
| gE upstream sequence      | P1:CGAA <u>AGCTT</u> TCGCCTCCTGCCCGCG   | <i>Hind</i> III   | AJ004801             | 120554-120570               |
|                           | P2:CTTTTGGTACCCTCTCGCGTGCGC             | <i>Kpn</i> I      | AJ004801             | 121694-121679               |
| gE downstream sequence    | P3:TCAAGTGGATCCTCCGCTAGGCG              | <i>Bam</i> HI     | AJ004801             | 123430-123444               |
|                           | P4:CGAATTC <u>CAAGCGCCG</u> CCAGCGAG    | <i>Eco</i> RI     | AJ004801             | 124570-124553               |
| EGFP gene                 | P5:GAACTGAGGTACCTACAGCGTGAGC            | <i>Kpn</i> I      | U55763               | 4396-4420                   |
|                           | P6:CGCGTTAGGATCCATTGATGAGTTTGG          | <i>Bam</i> HI     | U55763               | 1645-1619                   |
|                           | P7:GGGAGCGGGCAAGGCGGAGGAAGAC            |                   | AJ004801             | 121499-121523               |
|                           | P8:GGCGCGTCCTCGATGGTGAGCTCGA            |                   | AJ004801             | 123657-123681               |
| Identification of gE gene | P9:CCTGTTGCTCTGGATGGTGGTGCTG            |                   | AJ004801             | 120295-120319               |
|                           | P10:GAATCAGGGGATAACGCAGGAAAGA<br>ACA    |                   | U55763               | 4676-4703                   |
| Identification of gG gene | P11: CCGACCGCCTCCTACACCAGATGCT          |                   | AJ004801             | 117102-117126               |
|                           | P12: GGGTGTAGGCAAGCTCACCGCAACG          |                   | AJ004801             | 118937-118961               |
| Identification of tk gene | P13:ACGGGCTGGGAAAGACAACAACGG            |                   | AJ004801             | 63315-63338                 |
|                           | P14:GCGGACACGTCCAGCACGAACA              |                   | AJ004801             | 64161-64182                 |

a: The underlined sequence indicates the restriction sit.

**Table S2.** The total identified virion proteins of the three strains under investigation after LC-MS/MS peptides identification and database search using UNIPROT.

| Protein<br>accession No                 | Gene<br>Name | Protein Description                 | Protein Metabolic<br>Function and<br>biological process | MS/MS<br>Count wt<br>BoHV-1 | MS/MS<br>Count<br>Goat<br>BoHV-1 | MS/MS<br>Count<br>BoHV-1<br>gG-/tk- | MS/MS<br>Count<br>BoHV-1<br>gG-/tk-/gE- |
|-----------------------------------------|--------------|-------------------------------------|---------------------------------------------------------|-----------------------------|----------------------------------|-------------------------------------|-----------------------------------------|
| 11 Enveloped proteins                   |              |                                     |                                                         |                             |                                  |                                     |                                         |
| O39506                                  | US8          | Envelope glycoprotein E             | Cell-to-cell spread                                     | 155                         | 172                              | 186                                 | 0                                       |
| O39504                                  | US4          | Envelope glycoprotein G             | Cell-to-cell spread                                     | 185                         | 158                              | 1                                   | 3                                       |
| O39498                                  | UL1          | Envelope glycoprotein L             | Cell entry/cell-to-cell spread                          | 43                          | 30                               | 35                                  | 28                                      |
| K4P1A7                                  | UL10         | Envelope glycoprotein M             | Cell entry/cell-to-cell spread                          | 278                         | 261                              | 252                                 | 245                                     |
| K4PEP2                                  | UL22         | Envelope glycoprotein H             | Cell entry/cell-to-cell spread                          | 199                         | 193                              | 176                                 | 145                                     |
| K4P1I3                                  | UL27         | Envelope glycoprotein B             | Cell entry/cell-to-cell spread                          | 947                         | 728                              | 906                                 | 1152                                    |
| Q77CE0                                  | UL44         | Envelope glycoprotein C             | Cell attachment                                         | 646                         | 420                              | 355                                 | 666                                     |
| K4P170                                  | UL49.5       | Envelope glycoprotein N             | Unknown                                                 | 94                          | 75                               | 75                                  | 87                                      |
| K4P3M5                                  | UL53         | Envelope glycoprotein K             | Cell entry/cell-to-cell spread                          | 22                          | 20                               | 26                                  | 13                                      |
| K4P3S4                                  | US6          | Envelope glycoprotein D             | Cell attachment                                         | 337                         | 242                              | 211                                 | 322                                     |
| O39505                                  | US7          | Envelope glycoprotein I             | Cell-to-cell spread                                     | 146                         | 129                              | 136                                 | 37                                      |
| 8 Capsid proteins                       |              |                                     |                                                         |                             |                                  |                                     |                                         |
| K4P3M0                                  | UL6          | Capsid portal protein               | DNA encapsulation                                       | 56                          | 62                               | 62                                  | 66                                      |
| K4P1J1                                  | UL18         | Capsid Triplex Subunit 2            | Capsid morphogenesis                                    | 188                         | 201                              | 181                                 | 250                                     |
| K4P3Q3                                  | UL19         | Major Capsid protein                | Capsid morphogenesis                                    | 718                         | 940                              | 871                                 | 1036                                    |
| K4PEN7                                  | UL26         | Capsid scaffolding protein          | Scaffold/serine protease                                | 56                          | 76                               | 75                                  | 87                                      |
| Q77CD3                                  | UL35         | Small capsomere-interacting protein | Unknown                                                 | 152                         | 165                              | 187                                 | 209                                     |
| Q77CD6                                  | UL38         | Capsid Triplex Subunit 1            | Capsid morphogenesis                                    | 147                         | 170                              | 142                                 | 194                                     |
| K4P3L1                                  | UL17         | Capsid vertex component 1           | Viral entry/release, viral genome packaging             | 107                         | 115                              | 96                                  | 77                                      |
| O39492                                  | UL25         | Capsid vertex component 2           | Viral entry/release, viral genome packaging             | 138                         | 190                              | 180                                 | 143                                     |
| 15 Tegument and nuclear egress proteins |              |                                     |                                                         |                             |                                  |                                     |                                         |
| K4P3H9                                  | Circ         | Myristylated tegument protein       |                                                         | 112                         | 136                              | 156                                 | 64                                      |
| Q77CA9                                  | UL3.5        | Protein V57                         | Cell-to-cell spread                                     | 100                         | 85                               | 48                                  | 67                                      |
| K4P1A3                                  | UL16         | Cytoplasmic envelopment protein 2   | Possible virion egress & morphogenesis                  | 97                          | 112                              | 123                                 | 95                                      |

|                                                          |        |                                         |                                                 |      |     |     |     |
|----------------------------------------------------------|--------|-----------------------------------------|-------------------------------------------------|------|-----|-----|-----|
| K4P3L1                                                   | UL17   | Capsid vertex component 1               | Viral entry/release, viral genome packaging     | 107  | 115 | 96  | 77  |
| K4P3K8                                                   | UL21   | Tegument protein                        | Virion morphogenesis                            | 110  | 143 | 158 | 95  |
| O39492                                                   | UL25   | Capsid vertex component 2               | Unknown                                         | 138  | 190 | 180 | 143 |
| K4PEN0                                                   | UL36   | Very large tegument protein             | Capsid transport                                | 433  | 466 | 507 | 326 |
| K4P1H6                                                   | UL37   | Tegument protein                        | Virion morphogenesis                            | 167  | 182 | 211 | 142 |
| K4PEN4                                                   | UL31   | Nuclear egress protein 1                | Nuclear egress                                  | 20   | 44  | 27  | 24  |
| Q77CD2                                                   | UL34   | Nuclear egress protein 2                | Nuclear egress                                  | 7    | 7   | 9   | 5   |
| K4P3N0                                                   | UL49   | Tegument protein VP22                   | Virion morphogenesis                            | 398  | 368 | 321 | 238 |
| O39501                                                   | US1.67 | US1.67 protein                          | Unknown                                         | 54   | 34  | 16  | 32  |
| Q77CC2                                                   | UL20   | Virion protein                          | Unknown                                         | 22   | 20  | 26  | 11  |
| Q77CD9                                                   | UL43   | Virion protein                          | Unknown                                         | 61   | 42  | 46  | 50  |
| O39507                                                   | US9    | Virion protein                          | Anterograde transport (reactivation of latency) | 4    | 7   | 3   | 0   |
| 31 Regulatory, Enzymatic and Cytoplasmic egress proteins |        |                                         |                                                 |      |     |     |     |
| Q77CC4                                                   | UL23   | Thymidine kinase TK                     | DNA biosynthesis & latency reactivation         | 18   | 15  | 0   | 2   |
| Q77CC6                                                   | UL28   | Tripartite terminase subunit 1          | Viral packaging and release                     | 8    | 12  | 11  | 10  |
| K4P189                                                   | UL29   | Major DNA-binding protein               | DNA replication                                 | 47   | 66  | 83  | 59  |
| K4P3K0                                                   | UL30   | DNA polymerase                          | DNA replication                                 | 27   | 61  | 30  | 24  |
| K4P1H9                                                   | UL32   | Packaging protein                       | Viral packaging and release                     | 5    | 9   | 9   | 5   |
| Q77CD1                                                   | UL33   | Tripartite terminase subunit 2          | Viral packaging and release                     | 5    | 5   | 5   | 3   |
| K4P179                                                   | UL39   | Ribonucleoside-diphosphate reductase 1. | DNA replication                                 | 48   | 56  | 49  | 45  |
| K4P3J2                                                   | UL40   | Ribonucleoside-diphosphate reductase 2. | DNA replication                                 | 18   | 16  | 19  | 16  |
| K4PEM5                                                   | UL41   | Virion host shutoff protein,            | Cellular mRNA degradation                       | 159  | 155 | 157 | 40  |
| K4P1H2                                                   | UL42   | DNA polymerase processivity subunit     | DNA replication                                 | 53   | 97  | 72  | 47  |
| K4P3I7                                                   | UL46   | Tegument protein VP11/12                | Possible gene regulation                        | 384  | 425 | 344 | 118 |
| K4PEM0                                                   | UL47   | Tegument protein VP8                    | Possible gene regulation                        | 1045 | 894 | 428 | 808 |
| K4P1G7                                                   | UL48   | Trans-inducing factor bTIF/VP16         | Gene regulation/virion morphogenesis            | 231  | 172 | 117 | 147 |
| Q77CE6                                                   | UL51   | Virion protein                          | Unknown                                         | 68   | 51  | 51  | 40  |

|        |        |                                                  |                                                         |     |     |     |    |
|--------|--------|--------------------------------------------------|---------------------------------------------------------|-----|-----|-----|----|
| K4P1G4 | UL52   | DNA primase                                      | Viral genome replication                                | 22  | 25  | 22  | 5  |
| K4P165 | UL54   | Multifunctional regulator, bICP27                | Gene regulation; RNA metabolism                         | 45  | 54  | 42  | 34 |
| O39503 | US3    | Virion serine/threonine protein kinase           | Unknown                                                 | 105 | 126 | 5   | 70 |
| K4P3M7 | BICP0  | Immediate-early transactivator protein           | Regulation of cellular process                          | 11  | 11  | 2   | 3  |
| K4P1C2 | BICP4  | Immediate-early transactivator protein           | Transcriptional regulator                               | 262 | 357 | 132 | 91 |
| K4P3M4 | UL2    | Uracil-DNA glycosylase                           | DNA repair                                              | 21  | 27  | 17  | 19 |
| K4PEQ8 | UL3    | Phosphoprotein                                   | Unknown                                                 | 34  | 29  | 19  | 26 |
| K4P1B2 | UL5    | DNA replication helicase                         | DNA replication                                         | 18  | 33  | 20  | 4  |
| K4PEQ3 | UL7    | Cytoplasmic envelopment protein 1                | Possible virion egress & morphogenesis                  | 25  | 23  | 23  | 13 |
| K4P1J6 | UL8    | DNA helicase/primase complex-                    | Viral genome replication                                | 9   | 12  | 5   | 5  |
| K4P3R1 | UL9    | Replication origin binding protein               | DNA replication                                         | 10  | 22  | 12  | 9  |
| K4PEP9 | UL12   | Alkaline nuclease                                | Metabolic process through endo & exonuclease activities | 35  | 49  | 34  | 39 |
| K4P1J4 | UL13   | Virion serine/threonine protein kinase           | Serine/threonine kinase                                 | 18  | 22  | 22  | 27 |
| Q77CB6 | UL14   | UL 14 protein                                    | Viral process                                           | 36  | 30  | 29  | 15 |
| K4PEP5 | UL15   | Tripartite terminase subunit 3                   | Viral packaging and release                             | 18  | 27  | 17  | 13 |
| K4P1D2 | BICP22 | Immediate-early and late transrepressor protein. | Unknown                                                 | 52  | 58  | 65  | 39 |
| Q77CE5 | UL50   | Deoxyuridine 5'-triphosphate nucleotidohydrolase | dUTP metabolic process                                  | 37  | 38  | 24  | 21 |

**Table S3.** Comparative upregulated and downregulated proteins detected in wt BoHV-1, double mutant BoHV-1 gG-/tk- and the triple mutant BoHV-1 gG-/tk-/gE-.

| Protein accession                         | Protein description | A/C Ratio | Regulated Type | Function                                    |
|-------------------------------------------|---------------------|-----------|----------------|---------------------------------------------|
| Wt BoHV-1 Vs double mutant BoHV-1 gG-/tk- |                     |           |                |                                             |
| Q77CC4                                    | Thymidine kinase    | 7.832     | Up             | (Virulence + latency + immune evasion)      |
| O39504                                    | Glycoprotein G      | 1549      | Up             | (Virulence) + immune suppression            |
| K4P3S4                                    | Glycoprotein D      | 2.464     | Up             | (Virulence & Entry & targeted ab + T cells) |
| O39498                                    | Glycoprotein L      | 1.507     | Up             | Cell entry/cell-to-cell spread              |
| Q77CE0                                    | Glycoprotein C      | 3.138     | Up             | (Virulence & Entry & targeted ab + T cells) |
| K4P170                                    | Glycoprotein N      | 2.513     | Up             | Virulence and immunosuppression             |
| K4P1A7                                    | Glycoprotein M      | 1.626     | Up             | Virulence & cell to cell spread             |
| K4P1C2                                    | BICP 4              | 3.493     | Up             | Transcriptional regulator                   |
| K4P1G7                                    | Alpha-TIF protein   | 2.686     | Up             | Gene regulation/virion morphogenesis        |
| K4P3I7                                    | UL 46 protein       | 1.605     | Up             | Possible gene regulation                    |

|                                                                  |                                            |         |      |                                                        |
|------------------------------------------------------------------|--------------------------------------------|---------|------|--------------------------------------------------------|
| K4P3R5                                                           | UL4 protein                                | 3.061   | Up   | Unknown                                                |
| Q77CE5                                                           | UL 50 protein                              | 2.564   | Up   | dUTP metabolic process                                 |
| K4PEM0                                                           | UL47 Vp8 protein                           | 4.731   | Up   | Critical for viral replication and immunosuppression.) |
| K4PEM5                                                           | UL 41 protein                              | 1.526   | Up   | Cellular mRNA degradation                              |
| K4PEP5                                                           | UL 15 protein                              | 1.569   | Up   | Viral packaging and release                            |
| K4PEQ8                                                           | UL 3 Phosphoprotein                        | 2.804   | Up   | Unknown                                                |
| Q77CD9                                                           | UL 43 protein                              | 3.161   | Up   | Virion entry                                           |
| O39501                                                           | US1.67 protein                             | 6.832   | Up   | Unknown                                                |
| Q77CE6                                                           | UL 51 protein                              | 2.384   | Up   | Virulence and viral growth                             |
| Q77CA9                                                           | UL3.5 protein                              | 5.404   | Up   | Cell-to-cell spread                                    |
| Q77CB6                                                           | UL14 protein                               | 1.735   | Up   | Viral process                                          |
| K4P189                                                           | Major DNA-binding protein                  | 0.499   | Down | DNA replication                                        |
| Wt BoHV-1 Vs triple mutant BoHV-1 gG-/tk-/gE-                    |                                            |         |      |                                                        |
| Q77CC4                                                           | Thymidine kinase                           | 8.882   | Up   | (Virulence + latency + immune evasion)                 |
| O39504                                                           | Glycoprotein G                             | 1032.66 | Up   | (Virulence) + immune suppression                       |
| O39506                                                           | Glycoprotein E                             | 740.2   | Up   | (Virulence) (Entry) (targeted ab) (reactivation)       |
| O39505                                                           | Glycoprotein I                             | 16.444  | Up   | Cell-to-cell spread                                    |
| K4P3M5                                                           | Glycoprotein K                             | 1.969   | Up   | (Entry, spread & infectious virus production)          |
| K4P1B2                                                           | DNA replication helicase                   | 3.037   | Up   | DNA replication                                        |
| K4P1C2                                                           | BICP 4                                     | 2.863   | Up   | Transcriptional regulator                              |
| K4P1G4                                                           | DNA primase                                | 2.733   | Up   | DNA replication                                        |
| K4P3I7                                                           | UL 46 protein                              | 3.669   | Up   | Possible gene regulation                               |
| K4PEM5                                                           | UL 41 protein                              | 5.236   | Up   | Cellular mRNA degradation                              |
| K4PEQ3                                                           | UL 7 protein                               | 2.334   | Up   | Possible virion egress & morphogenesis                 |
| O39501                                                           | US1.67 protein                             | 1.528   | Up   | Unknown                                                |
| Q77CB6                                                           | UL14 protein                               | 1.886   | Up   | Viral process                                          |
| Q77CC2                                                           | UL 20 protein                              | 1.82    | Up   | Unknown                                                |
| Q77CD9                                                           | UL 43 protein                              | 1.691   | Up   | Virion entry                                           |
| Q77CE6                                                           | UL 51 protein                              | 2.473   | Up   | Virulence and viral growth                             |
| K4P1I3                                                           | Glycoprotein B                             | 0.631   | Down | (Virulence & Entry & targeted ab )                     |
| K4P3S4                                                           | Glycoprotein D                             | 0.635   | Down | (Virulence & Entry & targeted ab + T cells)            |
| Q77CD6                                                           | Triplex capsid protein 1                   | 0.526   | Down | Capsid morphogenesis                                   |
| K4P1J1                                                           | Triplex capsid protein 2                   | 0.574   | Down | Capsid morphogenesis                                   |
| K4P1J4                                                           | US3 virion serine/threonine protein kinase | 0.603   | Down | Serine/threonine kinase                                |
| K4P3M0                                                           | Portal protein UL6                         | 0.549   | Down | DNA encapsidation                                      |
| K4P3Q3                                                           | Major capsid protein                       | 0.511   | Down | Capsid morphogenesis                                   |
| K4PEN4                                                           | Nuclear egress protein 1                   | 0.665   | Down | Nuclear egress                                         |
| K4PEN7                                                           | Capsid scaffolding protein                 | 0.43    | Down | Scaffold/serine protease                               |
| K4PEP9                                                           | Alkaline nuclease                          | 0.442   | Down | Metabolic process through endo&exonuclease activities  |
| Q77CC5                                                           | UL 24 protein                              | 0.509   | Down | Unknown                                                |
| Q77CD3                                                           | Small capsomere-interacting protein        | 0.469   | Down | Capsid morphogenesis                                   |
| Double mutant BoHV-1 gG-/tk- Vs triple mutant BoHV-1 gG-/tk-/gE- |                                            |         |      |                                                        |
| K4P3M5                                                           | Glycoprotein K                             | 1.612   | Up   | (Entry, spread & infectious virus production)          |
| O39505                                                           | Glycoprotein I                             | 13.254  | Up   | Cell-to-cell spread                                    |
| O39506                                                           | Glycoprotein E                             | 804.8   | Up   | (Virulence) (Entry) (targeted ab) (reactivation)       |
| K4P1B2                                                           | DNA replication helicase                   | 2.489   | Up   | DNA replication                                        |
| K4P1G4                                                           | DNA primase                                | 2.443   | Up   | DNA replication                                        |
| K4P3H9                                                           | Circ protein                               | 1.549   | Up   | Unknown                                                |

|        |                                     |       |      |                                                                                     |
|--------|-------------------------------------|-------|------|-------------------------------------------------------------------------------------|
| K4P3I7 | UL 46 protein                       | 2.286 | Up   | Possible gene regulation                                                            |
| K4PEM5 | Virion host shutoff factor          | 3.431 | Up   | Cellular mRNA degradation                                                           |
| Q77CC2 | UL 20 protein                       | 2.279 | Up   | Unknown                                                                             |
| Q77CD2 | Nuclear egress protein 2            | 1.594 | Up   | Nuclear egress                                                                      |
| K4PEQ3 | Cytoplasmic envelopment protein 1   | 1.691 | Up   | Possible virion egress & morphogenesis                                              |
| K4P170 | Glycoprotein N                      | 0.391 | Down | Virulence and immunosuppression                                                     |
| K4P1A7 | Glycoprotein M                      | 0.554 | Down | Virulence & cell to cell spread                                                     |
| K4P1I3 | Glycoprotein B                      | 0.475 | Down | (Virulence & Entry & targeted ab )                                                  |
| K4P3S4 | Glycoprotein D                      | 0.258 | Down | (Virulence & Entry & targeted ab + T cells)                                         |
| O39498 | Glycoprotein L                      | 0.623 | Down | Cell entry/cell-to-cell spread                                                      |
| Q77CE0 | Glycoprotein C                      | 0.273 | Down | (Virulence & Entry & targeted ab + T cells)                                         |
| Q77CD6 | Triplex capsid protein 1            | 0.365 | Down | Capsid morphogenesis                                                                |
| K4P1J1 | Triplex capsid protein 2            | 0.47  | Down | Capsid morphogenesis                                                                |
| K4P3M0 | Portal protein                      | 0.469 | Down | DNA encapsidation                                                                   |
| K4P3M4 | Uracil-DNA glycosylase              | 0.615 | Down | DNA repair                                                                          |
| K4P3M7 | BICP0                               | 0.511 | Down | Regulation of cellular process + Regulation of cellular process + immunosuppression |
| K4P3Q3 | Major capsid protein                | 0.481 | Down | Capsid morphogenesis                                                                |
| K4P3R5 | UL 4 protein                        | 0.285 | Down | unknown                                                                             |
| K4PEM0 | UL 47 Vp8 protein                   | 0.26  | Down | Critical for viral replication and immunosuppression.)                              |
| K4PEN7 | Capsid scaffolding protein          | 0.456 | Down | Scaffold/serine protease                                                            |
| K4PEP5 | Tripartite terminase subunit 3      | 0.621 | Down | Viral packaging and release                                                         |
| K4PEP9 | Alkaline nuclease                   | 0.381 | Down | Metabolic process through endo&exonuclease activities                               |
| K4PEQ8 | Phosphoprotein UL 3                 | 0.258 | Down | unknown                                                                             |
| O39501 | US1.67 protein                      | 0.224 | Down | unknown                                                                             |
| Q77CA9 | UL3.5 protein                       | 0.261 | Down | Cell-to-cell spread                                                                 |
| Q77CD3 | Small capsomere-interacting protein | 0.446 | Down | Capsid morphogenesis                                                                |
| Q77CD9 | UL 43 protein                       | 0.535 | Down | Virion entry                                                                        |
| Q77CE5 | UL 50 protein                       | 0.497 | Down | dUTP metabolic process                                                              |
| K4P1G7 | Alpha-TIF protein                   | 0.402 | Down | Gene regulation/virion morphogenesis                                                |

**Table S4.** Mean number of days of fever, ocular and nasal lesions, cough, and nasal virus shedding after intranasal inoculation.

| Virus                | Fever >39.7 °C | Nasal discharges | Ocular discharges | Cough   | Virus shedding | Highest titer of virus shedding log <sub>10</sub> PFU/ml (day) |
|----------------------|----------------|------------------|-------------------|---------|----------------|----------------------------------------------------------------|
| BoHV-1 gG/tk/gE-     | 0              | 0                | 0                 | 0       | 3.5±0.8        | 2.04 (4)                                                       |
| BoHV-1 gG/tk-        | 0              | 0.7±1.2          | 1.0±1.5           | 0       | 6.3±1.4        | 2.83 (4)                                                       |
| wt BoHV-1            | 4.7±1.5        | 3.3±2.0          | 8.0±1.0           | 3.7±4.7 | 12.0±1.0       | 3.73(5)                                                        |
| Unvaccinated control | 0              | 0                | 0                 | 0       | 0              | 0                                                              |

**Table S5.** Mean number of days of fever, ocular and nasal lesions, cough, and nasal virus shedding after challenge.

| Challenge virus | Virus            | Fever > 39.7 °C | Nasal discharges | Ocular discharges | Cough   | Virus shedding | Highest titer of virus shedding log <sub>10</sub> PFU/ml (day) |
|-----------------|------------------|-----------------|------------------|-------------------|---------|----------------|----------------------------------------------------------------|
| wt BHV-1        | BoHV-1 gG/tk/gE- | 1.3±0.6         | 0.7±0.6          | 3.7±4.0           | 0.3±0.6 | 9.3±1.1        | 4.18 (5)                                                       |
|                 | BoHV-1 gG/tk-    | 0.7±1.1         | 0                | 2.7±3.8           | 0       | 6.0±1.0        | 3.18 (5)                                                       |

|          |                      |         |         |         |         |          |          |
|----------|----------------------|---------|---------|---------|---------|----------|----------|
|          | Unvaccinated control | 3.3±0.6 | 2.7±0.6 | 8.0±2.6 | 1.0±1.7 | 11.3±1.5 | 5.32 (5) |
|          | Blank control        | 0       | 0       | 0       | 0       | 0        | 0        |
|          | BoHV-1 gG/tk-/gE-    | 0.7±1.1 | 0.3±0.6 | 4.7±1.2 | 0.3±0.6 | 9.3±1.5  | 3.25 (6) |
|          | BoHV-1 gG-/tk-       | 0.7±0.6 | 4.0±2.6 | 2.3±1.5 | 0.3±0.6 | 8.0±1.0  | 2.88 (4) |
| wt BHV-5 | Unvaccinated control | 3.0±2.6 | 2.0±1.7 | 6.3±3.2 | 1.7±1.5 | 12.0±1.7 | 4.06 (6) |
|          | Blank control        | 0       | 0       | 0       | 0       | 0        | 0        |

**Table S6.** Assessment of protection rates based on different scoring systems.

| Challenge virus | Scoring systems      |             | Score means of the different groups |                |       |      |
|-----------------|----------------------|-------------|-------------------------------------|----------------|-------|------|
|                 |                      |             | BoHV-1 gG-/tk-/gE-                  | BoHV-1 gG-/tk- | UC    | NC   |
| wt BoHV-1       | Clinical signs       | Score means | 0.82                                | 0.50           | 2.0   | 0.07 |
|                 |                      | PE(%)       | 61.1                                | 77.8           | /     | /    |
|                 | Lung gross pathology | Score means | 6.00                                | 2.67           | 13.33 | 2.00 |
|                 |                      | PE(%)       | 64.7                                | 94.1           | /     | /    |
|                 | Total                | Score means | 6.82                                | 3.17           | 15.33 | 2.07 |
|                 |                      | PE(%)       | 64.2                                | 91.7           | /     | /    |
| wt BoHV-5       | Clinical signs       | Score means | 0.64                                | 0.76           | 1.31  | 0.07 |
|                 |                      | PE(%)       | 53.8                                | 44.2           | /     | /    |
|                 | Lung gross pathology | Score means | 6.00                                | 9.00           | 15.33 | 2.00 |
|                 |                      | PE(%)       | 69.9                                | 47.5           | /     | /    |
|                 | Total                | Score means | 6.64                                | 9.76           | 16.64 | 2.07 |
|                 |                      | PE(%)       | 68.6                                | 47.22          | /     | /    |

Note: PE represents protection rate and was calculated according to the formula as follows:

$$PE\% = (SUC - SNC) - (SVAC - SNC) / (SUC - SNC) \times 100$$

$$= 1 - (SVAC - SNC) / (SUC - SNC) \times 100$$

where S represents the score means of individual groups of UC (Unvaccinated control), NC (negative control), vaccination (VAC) groups BoHV-1 gG-/tk-/gE-, and BoHV-1 gG-/tk-, respectively.

**Table S7.** IL-4 detection after vaccination. Number of IL-4 detectable animals (means ± SD).

| Group              | Animals |              | Positive animals (means ± SD) IU/μg |              |              |               |                               |
|--------------------|---------|--------------|-------------------------------------|--------------|--------------|---------------|-------------------------------|
|                    | no      | 0 dpi        | 1 dpi                               | 3 dpi        | 5 dpi        | 7 dpi         | 14 dpi                        |
| BoHV-1 gG-/tk-/gE- | 6       | 1 (0.04±0.1) | 1 (0.5±1.1)                         | 2 (4.7±8.3)  | 2 (9.1±14.4) | 2 (4.5±8.7)   | 1 (0.3±0.6)                   |
| BoHV-1 gG-/tk-     | 6       | 3 (2.0±3.3)  | 6 (14.8±12.9)                       | 2 (4.9±11.3) | 4 (9.4±12.1) | 5 (14.5±13.3) | 2 (56.0±135.259) <sup>a</sup> |
| wt BoHV-1          | 3       | 0            | 0                                   | 0            | 0            | 0             | 0                             |

<sup>a</sup>: The letter represents the difference between groups. The level of IL-4 in BoHV-1 gG-/tk- vaccinated group was higher than that of BoHV-1 gG-/tk-/gE- and wt BoHV-1 vaccinated group ( $p < 0.05$ ).

## Reference

- Wei, H.; He, J.; Paulsen, D.B.; Chowdhury, S.I. Bovine herpesvirus type 1 (BHV-1) mutant lacking UL49.5 luminal domain residues 30–32 and cytoplasmic tail residues 80–96 induces more rapid onset of virus neutralizing antibody and cellular immune responses in calves than the wild-type strain Cooper. *Veter-Immunol. Immunopathol.* **2012**, *147*, 223–229, doi:10.1016/j.vetimm.2012.04.015.
- Chowdhury, S.I. Construction and characterization of an attenuated bovine herpesvirus type 1 (BHV-1) recombinant virus. *Veter- Microbiol.* **1996**, *52*, 13–23, doi:10.1016/0378-1135(96)00043-0
